# Supplementary material for: Toxic effects of copper-based nanoparticles or compounds to lettuce (Lactuca sativa) and alfalfa (Medicago sativa)
Source: Royal Society of Chemistry journal article supplement (doi:10.1039/c4em00551a), 2014-11-28
Supplement: c4em00551a1.pdf [file c4em00551a1.pdf]

## **Toxic Effects of Copper-based Nanoparticles or Compounds to Lettuce (*Lactuca sativa*) and Alfalfa (*Medicago sativa*)**

Jie Hong<sup>a</sup>, Cyren Rico<sup>b,d</sup>, Lijaun Zhao<sup>a,d</sup>, Adeyemi S. Adeleye<sup>c,d</sup>, Arturo A. Keller<sup>c,d</sup>, Jose R. Peralta-Videa<sup>a,b,d</sup> Jorge L. Gardea-Torresdey<sup>a,b,d\*</sup>

<sup>a</sup>Environmental Science and Engineering PhD program, The University of Texas at El Paso, 500 W. Univ. Av., El Paso, Texas 79968

<sup>b</sup>Chemistry Department, The University of Texas at El Paso; 500 W. Univ. Av., El Paso, TX 79968

<sup>c</sup>Bren School of Environmental Science & Management, University of California, Santa Barbara, CA 93106–5131, USA

<sup>d</sup>Center for Environmental Implications of Nanotechnology (UC CEIN), The University of Texas at El Paso; 500 W. Univ. Av., El Paso, TX 79968

\*Corresponding author (J. Gardea-Torresdey) [jgardea@utep.edu](mailto:jgardea@utep.edu); phone 915-747-5359 fax (915) 747-5748

## Supplementary Information

### Figure legends

**Figure S1.** Root elongation of lettuce (**A**) and alfalfa (**B**) plants exposed for 15 days in hydroponics to 0, 5, 10, 20 mg/L of Cu NPs/compounds. Plants were cultivated for 10 days in Hoagland nutrient solution before exposure to Cu treatments. Data are averages of four replicates  $\pm$  SE. \* stands for statistic differences at  $p \leq 0.05$ .

**Figure S2.** Shoot elongation of 10 day-old lettuce treated for 15 days in hydroponics with 0, 5, 10, 20 mg/L Cu NPs/compounds. Data are averages of four replicates  $\pm$  SE. Different letters stand for statistic differences at  $p \leq 0.05$ .

**Table S1.** Major physicochemical properties of the particles used in this study

| <b>Property</b>                         | <b><i>n</i>CuO</b>                | <b>Bulk CuO</b>                   | <b><i>n</i>Cu</b>                 | <b>Bulk Cu</b>                 | <b>Kocide 3000</b>      | <b>CuPRO 2005</b>                 |
|-----------------------------------------|-----------------------------------|-----------------------------------|-----------------------------------|--------------------------------|-------------------------|-----------------------------------|
| Primary particle size (nm)              | 10 <sup>1</sup> – 10 <sup>2</sup> | 10 <sup>2</sup> – 10 <sup>4</sup> | 10 <sup>2</sup> – 10 <sup>3</sup> | < 10 <sup>4</sup>              | >10 <sup>4</sup>        | 10 <sup>4</sup> – 10 <sup>6</sup> |
| Hydrodynamic diameter (nm) <sup>a</sup> | 280±15                            | 376±26                            | 2590±1138                         | 4546±3940                      | 1532±580                | 4779±4767                         |
| Zeta potential (mV) <sup>a</sup>        | -34.4±0.5                         | -42.7±0.153±                      | -29.4±0.8                         | -35.4±1.27                     | -40.9±2.7               | -47.8±1.1                         |
| Cu content (wt. %)                      | 74.3                              | 79.7                              | 83.3                              | 98.7                           | 26.5                    | 34.0                              |
| Other elements present                  | O, C                              | O                                 | O, C                              | ND                             | C, O, Na, Al, Si, S, Cl | C, O, Na, Al, Si, P, Ca           |
| Morphology                              | Rhombus, irregular                | Prism, irregular                  | Irregular                         | Dendritic, plate-like, rhombus | Spherical               | Spherical                         |
| Main Copper phase                       | CuO                               | CuO                               | Cu, Cu <sub>2</sub> O             | Cu                             | Cu(OH) <sub>2</sub>     | Cu(OH) <sub>2</sub>               |
| Crystal structure                       | Monoclinic                        | Monoclinic                        | Cubic                             | Cubic                          | Orthorhombic            | Orthorhombic                      |

<sup>a</sup>Measurement was done at pH 7

ND = Non-detect

Table S2. Element accumulation in lettuce roots (mg/kg). Data are averages of four replicates  $\pm$  SE. Different letters stand for statistical differences at  $p \leq 0.05$ . \* stands for statistic differences at  $p \leq 0.05$ .

| Treatments        | 5 mg/L                 | 10 mg/L               | 20 mg/L                |
|-------------------|------------------------|-----------------------|------------------------|
| <i>n</i> Cu       | 6338.5 $\pm$ 731.3 c   | 9373.9 $\pm$ 1061.3 b | 13318.8 $\pm$ 458.9 c  |
| Bulk Cu           | 5034.9 $\pm$ 213.8 bc  | 7960.7 $\pm$ 501.3 ab | 11111.4 $\pm$ 365.9 bc |
| <i>n</i> Cu0      | 3555.8 $\pm$ 210.5 ab  | 9140.9 $\pm$ 99.4 ab  | 9941.3 $\pm$ 531.0 ab  |
| Bulk Cu0          | 3156.2 $\pm$ 394.4 ab  | 6992.6 $\pm$ 790.9 a  | 6941.3 $\pm$ 673.0 a   |
| CuPRO 2005        | 3427.0 $\pm$ 265.3 ab  | 7313.4 $\pm$ 490.9 a  | 8459.5 $\pm$ 360.5 ab  |
| Kocide 3000       | 2136.5 $\pm$ 54.3 a    | 7674.1 $\pm$ 417.7 a  | 7505.3 $\pm$ 161.5 a   |
| CuCl <sub>2</sub> | 5770.7 $\pm$ 900.3 c   | 11796.1 $\pm$ 214.9 c | 20366.5 $\pm$ 2440 d   |
| <i>n</i> Cu       | 1103.9 $\pm$ 1103.8 ab | ND                    | ND                     |
| Bulk Cu           | ND a                   | ND                    | ND                     |
| <i>n</i> Cu0      | 4783.1 $\pm$ 120.4 c   | ND                    | ND                     |
| P Bulk Cu0        | 8573.5 $\pm$ 281.2 d   | ND                    | ND                     |
| CuPRO 2005        | 3786.8 $\pm$ 1787.2 bc | ND                    | ND                     |
| Kocide 3000       | 4271.0 $\pm$ 478.2 c   | ND                    | ND                     |
| CuCl <sub>2</sub> | 349.9 $\pm$ 349.9 ab   | ND                    | ND                     |
| <i>n</i> Cu       | 570.1 $\pm$ 89.6 a     | 640.1 $\pm$ 74.1 a    | 457.4 $\pm$ 126.5      |
| Bulk Cu           | 680.8 $\pm$ 97.5 a     | 851.2 $\pm$ 68.6 a    | 678.7 $\pm$ 64.3       |
| <i>n</i> Cu0      | 709.5 $\pm$ 61.6 a     | 977.4 $\pm$ 55.7 a    | 979.7 $\pm$ 522.9      |
| Fe Bulk Cu0       | 940.9 $\pm$ 64.4 a     | 1088.1 $\pm$ 63.8 ab  | 736.7 $\pm$ 137.2      |
| CuPRO 2005        | 1209.7 $\pm$ 104.1 ab  | 951.9 $\pm$ 38.4 a    | 512.7 $\pm$ 10.2       |
| Kocide 3000       | 550.3 $\pm$ 7.85 a     | 1168.3 $\pm$ 211.4 ab | 902.5 $\pm$ 94.4       |
| CuCl <sub>2</sub> | 1681.2 $\pm$ 378.2 b   | 1750.1 $\pm$ 351.2 b  | 1646.5 $\pm$ 272.2 *   |
| <i>n</i> Cu       | 1583.5 $\pm$ 63.3 abc  | 1568.0 $\pm$ 30.8 a   | 1735.5 $\pm$ 32.4 ab   |
| Bulk Cu           | 1863.6 $\pm$ 71.2 bc   | 1614.8 $\pm$ 16.1 a   | 1551.3 $\pm$ 9.7 a     |
| S <i>n</i> Cu0    | 1449.1 $\pm$ 98.1 a    | 1579.4 $\pm$ 36.6 a   | 1638.6 $\pm$ 128 ab    |
| Bulk Cu0          | 1560.6 $\pm$ 67.6 ab   | 1811.7 $\pm$ 90.5 ab  | 1652.1 $\pm$ 31.5 ab   |
| CuPRO 2005        | 1804.5 $\pm$ 78.6 bc   | 1604.1 $\pm$ 48.2 a   | 1543.9 $\pm$ 37.7 a    |
| Kocide 3000       | 1470.1 $\pm$ 51.3 a    | 1950.8 $\pm$ 94.6 bc  | 1860.4 $\pm$ 44.5 b    |
| CuCl <sub>2</sub> | 1908.6 $\pm$ 72.6 c    | 2179.8 $\pm$ 70.7 c   | 2520.7 $\pm$ 59.4 c    |

Table S3. Element accumulation in lettuce shoots (mg/kg). Data are averages of four replicates  $\pm$  SE. Different letters stand for statistical differences at  $p \leq 0.05$ . \* stands for statistic differences at  $p \leq 0.05$ .

| Treatments        | 5 mg/L                | 10 mg/L             | 20 mg/L             |
|-------------------|-----------------------|---------------------|---------------------|
| <i>r</i> Cu       | 30.2 $\pm$ 1.4 bc     | 45.8 $\pm$ 2.4 ab   | 78.6 $\pm$ 1.8 *    |
| Bulk Cu           | 29.1 $\pm$ 0.9 bc     | 23.3 $\pm$ 0.6 a    | 27.5 $\pm$ 0.6      |
| <i>r</i> Cu0      | 23.3 $\pm$ 0.9 ab     | 28.8 $\pm$ 5.7 ab   | 25.6 $\pm$ 3.8      |
| Cu Bulk Cu0       | 23.6 $\pm$ 1.8 ab     | 31.1 $\pm$ 2.2 ab   | 20.8 $\pm$ 2.6      |
| CuPRO 2005        | 24.6 $\pm$ 0.4 abc    | 33.3 $\pm$ 3.5 ab   | 41.0 $\pm$ 3.8      |
| Kocide 3000       | 20.0 $\pm$ 1.4 a      | 52.4 $\pm$ 9/7 b    | 34.6 $\pm$ 5.1      |
| CuCl <sub>2</sub> | 31.6 $\pm$ 3.2 c      | 49.0 $\pm$ 9.7 ab   | 24.3 $\pm$ 10.6     |
| <i>r</i> Cu       | 4946.8 $\pm$ 164.5 bc | 5056.1 $\pm$ 586.8  | 5139.4 $\pm$ 263.4  |
| Bulk Cu           | 5883.0 $\pm$ 233.5 c  | 5358.5 $\pm$ 295.0  | 5172.5 $\pm$ 160.2  |
| <i>r</i> Cu0      | 5132.9 $\pm$ 320.1 bc | 4958.4 $\pm$ 151.2  | 5610.6 $\pm$ 92.7   |
| P Bulk Cu0        | 5735.0 $\pm$ 240.7 c  | 4739.9 $\pm$ 112.5  | 4878.9 $\pm$ 258.6  |
| CuPRO 2005        | 5063.6 $\pm$ 167.2 bc | 4606.8 $\pm$ 277.2  | 4615.0 $\pm$ 239.0  |
| Kocide 3000       | 4244.4 $\pm$ 316.0 ab | 4129.6 $\pm$ 43.7   | 4817.3 $\pm$ 69.8   |
| CuCl <sub>2</sub> | 3848.1 $\pm$ 217.2 a  | 4264.2 $\pm$ 219.9  | 4803.1 $\pm$ 403.9  |
| <i>r</i> Cu       | 26.3 $\pm$ 2.1 a      | 27.0 $\pm$ 3.3 ab   | 35.6 $\pm$ 1.9      |
| Bulk Cu           | 46.1 $\pm$ 5.7 ab     | 25.7 $\pm$ 0.6 a    | 35.3 $\pm$ 0.9      |
| <i>r</i> Cu0      | 31.9 $\pm$ 3.7 a      | 25.6 $\pm$ 1.6 a    | 50.6 $\pm$ 8.7      |
| Fe Bulk Cu0       | 68.5 $\pm$ 13.3 b     | 27.7 $\pm$ 0.2 ab   | 28.5 $\pm$ 2.7      |
| CuPRO 2005        | 35.2 $\pm$ 2.6 a      | 37.2 $\pm$ 1.5 bc   | 28.4 $\pm$ 2.0      |
| Kocide 3000       | 26.1 $\pm$ 0.3 a      | 31.5 $\pm$ 3.7 abc  | 36.2 $\pm$ 5.7      |
| CuCl <sub>2</sub> | 39.1 $\pm$ 0.6 a      | 41.2 $\pm$ 3.3 c    | 42.3 $\pm$ 5.5      |
| <i>r</i> Cu       | 441.7 $\pm$ 26.9 a    | 441.6 $\pm$ 13.0 b  | 401.4 $\pm$ 10.1 ab |
| Bulk Cu           | 497.3 $\pm$ 31.8 ab   | 440.4 $\pm$ 15.4 b  | 420.2 $\pm$ 5.3 ab  |
| <i>r</i> Cu0      | 500.9 $\pm$ 73.9 b    | 391.4 $\pm$ 6.7 ab  | 408.5 $\pm$ 10.7 ab |
| S Bulk Cu0        | 396.5 $\pm$ 15.8 a    | 443.1 $\pm$ 2.7 b   | 372.4 $\pm$ 5.2 ab  |
| CuPRO 2005        | 355.0 $\pm$ 16.3 a    | 357.3 $\pm$ 7.8 a   | 358.6 $\pm$ 8.9 a   |
| Kocide 3000       | 350.2 $\pm$ 2.6 a     | 427.0 $\pm$ 21.3 ab | 434.8 $\pm$ 2.3 b   |
| CuCl <sub>2</sub> | 424.2 $\pm$ 20.7 a    | 367.5 $\pm$ 29.3 ab | 428.2 $\pm$ 31.5 b  |

Table S4. Element accumulation in alfalfa roots (mg/kg). Data are averages of four replicates  $\pm$  SE. Different letters stand for statistical differences at  $p \leq 0.05$ . \* stands for statistic differences at  $p \leq 0.05$ .

| Treatments        | 5 mg/L                | 10 mg/L               | 20 mg/L                |
|-------------------|-----------------------|-----------------------|------------------------|
| <i>n</i> Cu       | 1038.7 $\pm$ 339.6 a  | 2995.3 $\pm$ 765.8 a  | 6479.0 $\pm$ 435.6 b   |
| Bulk Cu           | 1091.5 $\pm$ 113.0 a  | 2106.1 $\pm$ 145.0 a  | 1890.5 $\pm$ 166.3 a   |
| <i>n</i> Cu0      | 1882.8 $\pm$ 95.2 bc  | 3977.7 $\pm$ 141.6 ab | 3463.7 $\pm$ 83.9 a    |
| Cu Bulk Cu0       | 1341.4 $\pm$ 102.6 ab | 2964.4 $\pm$ 215.1 a  | 4651.6 $\pm$ 543.4 ab  |
| CuPRO 2005        | 2503.0 $\pm$ 100.5 c  | 2286.1 $\pm$ 736.7 a  | 1914.2 $\pm$ 534.6 a   |
| Kocide 3000       | 2014.6 $\pm$ 20.3 bc  | 2938.3 $\pm$ 625.4 a  | 3348.0 $\pm$ 155.7 a   |
| CuCl <sub>2</sub> | 1641.7 $\pm$ 130.0 ab | 5106.4 $\pm$ 353.9 b  | 12391.6 $\pm$ 1353.7 c |
| <i>n</i> Cu       | 2768.6 $\pm$ 309.1    | ND                    | ND                     |
| Bulk Cu           | 3151.5 $\pm$ 104.5    | 1267.4 $\pm$ 63.3     | 1875.8 $\pm$ 157.6     |
| <i>n</i> Cu0      | 573.8 $\pm$ 436.8     | ND                    | ND                     |
| P Bulk Cu0        | 2419.2 $\pm$ 164.3    | ND                    | ND                     |
| CuPRO 2005        | 1458.0 $\pm$ 1313.5   | ND                    | ND                     |
| Kocide 3000       | 369.7 $\pm$ 152.4     | ND                    | ND                     |
| CuCl <sub>2</sub> | 2133.5 $\pm$ 45.7     | ND                    | ND                     |
| <i>n</i> Cu       | 369.6 $\pm$ 85.6 ab   | 466.2 $\pm$ 42.4 b    | 342.9 $\pm$ 26.3       |
| Bulk Cu           | 262.8 $\pm$ 3.3 a     | 470.6 $\pm$ 15.4 b    | 365.3 $\pm$ 51.9       |
| <i>n</i> Cu0      | 377.6 $\pm$ 22.4 ab   | 441.1 $\pm$ 1.9 b     | 332.8 $\pm$ 14.7       |
| Fe Bulk Cu0       | 340.0 $\pm$ 91.1 ab   | 533.0 $\pm$ 53.6 b    | 411.1 $\pm$ 10.5       |
| CuPRO 2005        | 530.8 $\pm$ 45.8 ab   | 544.3 $\pm$ 30.7 b    | 283.6 $\pm$ 17.3       |
| Kocide 3000       | 483.4 $\pm$ 58.9 ab   | 206.8 $\pm$ 13.5 a    | 203.3 $\pm$ 13.5       |
| CuCl <sub>2</sub> | 577.2 $\pm$ 42.1 b    | 844.4 $\pm$ 58.7 c    | 1048.9 $\pm$ 186.1 *   |
| <i>n</i> Cu       | 1061.6 $\pm$ 22.1 a   | 1445.1 $\pm$ 99.9 a   | 1440.3 $\pm$ 125.5 bc  |
| Bulk Cu           | 1101.4 $\pm$ 16.9 a   | 1224.5 $\pm$ 45.5 a   | 1035.5 $\pm$ 24.1 a    |
| <i>n</i> Cu0      | 962.1 $\pm$ 65.9 a    | 1246.9 $\pm$ 68.9 a   | 1171.4 $\pm$ 17.1 ab   |
| S Bulk Cu0        | 1126.5 $\pm$ 21.6 a   | 1244.7 $\pm$ 47.1 a   | 1381.3 $\pm$ 28.2 bc   |
| CuPRO 2005        | 1408.0 $\pm$ 30.9 b   | 1444.6 $\pm$ 120.2 a  | 1628.1 $\pm$ 154.4 cd  |
| Kocide 3000       | 1492.3 $\pm$ 23.7 bc  | 1632.3 $\pm$ 127.5 ab | 1828.5 $\pm$ 57.2 d    |
| CuCl <sub>2</sub> | 1600.8 $\pm$ 71.4 c   | 2013.9 $\pm$ 154.7 b  | 2198.6 $\pm$ 27.7 e    |

Table S5. Element accumulation in alfalfa shoots (mg/kg). Data are averages of four replicates  $\pm$  SE. Different letters stand for statistical differences at  $p \leq 0.05$ . \* stands for statistic differences at  $p \leq 0.05$ .

| Treatments        | 5 mg/L                | 10 mg/L               | 20 mg/L                |
|-------------------|-----------------------|-----------------------|------------------------|
| <i>r</i> Cu       | 123.3 $\pm$ 41.7 ab   | 123.9 $\pm$ 32.0      | 297.6 $\pm$ 6.1 b      |
| Bulk Cu           | 44.2 $\pm$ 4.0 a      | 51.5 $\pm$ 8.1        | 102.5 $\pm$ 19.0 a     |
| <i>r</i> Cu0      | 147.1 $\pm$ 5.6 b     | 70.4 $\pm$ 17.9       | 125.6 $\pm$ 5.3 a      |
| Cu Bulk Cu0       | 48.9 $\pm$ 10.0 a     | 74.6 $\pm$ 12.7       | 96.2 $\pm$ 11.7 a      |
| CuPR0 2005        | 153.9 $\pm$ 22.2 b    | 146.1 $\pm$ 55.1      | 263.1 $\pm$ 70.5 ab    |
| Kocide 3000       | 175.3 $\pm$ 6.5 b     | 181.9 $\pm$ 13.9      | 159.8 $\pm$ 37.3 ab    |
| CuCl <sub>2</sub> | 121.7 $\pm$ 14.0 ab   | 325.0 $\pm$ 66.3 *    | 576.1 $\pm$ 37.2 c     |
| <i>r</i> Cu       | 4280.5 $\pm$ 233.0 c  | 4573.5 $\pm$ 256.7 c  | 3600.9 $\pm$ 255.1 abc |
| Bulk Cu           | 3384.9 $\pm$ 160.0 ab | 3317.0 $\pm$ 26.3 ab  | 3243.2 $\pm$ 212.5 ab  |
| <i>r</i> Cu0      | 2995.9 $\pm$ 310.0 a  | 3000.9 $\pm$ 44.1 a   | 2802.8 $\pm$ 63.6 a    |
| P Bulk Cu0        | 3051.0 $\pm$ 153.0 a  | 3187.7 $\pm$ 124.9 ab | 2783.9 $\pm$ 181.6 a   |
| CuPR0 2005        | 3565.7 $\pm$ 74.7 abc | 3530.4 $\pm$ 189.6 ab | 3859.6 $\pm$ 103.2 bc  |
| Kocide 3000       | 3575.9 $\pm$ 74.0 abc | 3780.7 $\pm$ 239.7 b  | 4280.9 $\pm$ 209.2 c   |
| CuCl <sub>2</sub> | 4014.4 $\pm$ 113.8 bc | 5350.8 $\pm$ 68.5 d   | 5559.1 $\pm$ 263.9 d   |
| <i>r</i> Cu       | 30.9 $\pm$ 2.4 abc    | 26.6 $\pm$ 2.9        | 25.0 $\pm$ 1.2         |
| Bulk Cu           | 19.0 $\pm$ 0.6 a      | 19.7 $\pm$ 0.5        | 24.8 $\pm$ 0.8         |
| <i>r</i> Cu0      | 38.0 $\pm$ 3.5 bc     | 18.7 $\pm$ 2.2        | 19.8 $\pm$ 1.3         |
| Fe Bulk Cu0       | 18.9 $\pm$ 0.9 a      | 20.3 $\pm$ 1.2        | 25.4 $\pm$ 1.4         |
| CuPR0 2005        | 25.3 $\pm$ 1.5 ab     | 22.7 $\pm$ 2.8        | 28.7 $\pm$ 7.9         |
| Kocide 3000       | 31.6 $\pm$ 0.5 abc    | 24.9 $\pm$ 1.3        | 24.9 $\pm$ 2.1         |
| CuCl <sub>2</sub> | 40.6 $\pm$ 6.7 c      | 42.8 $\pm$ 5.6 *      | 75.6 $\pm$ 5.8 *       |
| <i>r</i> Cu       | 3593.9 $\pm$ 81.6 e   | 5546.4 $\pm$ 817.5 *  | 2609.0 $\pm$ 187.4 bc  |
| Bulk Cu           | 2153.5 $\pm$ 105.8 d  | 1867.0 $\pm$ 171.7    | 1955.0 $\pm$ 131.8 ab  |
| <i>r</i> Cu0      | 1395.9 $\pm$ 91.5 ab  | 1973.6 $\pm$ 56.5     | 1638.6 $\pm$ 22.2 a    |
| S Bulk Cu0        | 1718.6 $\pm$ 74.6 bc  | 1696.8 $\pm$ 176.8    | 1846.6 $\pm$ 41.5 ab   |
| CuPR0 2005        | 1568.1 $\pm$ 79.3 ab  | 2271.3 $\pm$ 93.2     | 2226.2 $\pm$ 145.0 ab  |
| Kocide 3000       | 1297.4 $\pm$ 89.6 a   | 1804.0 $\pm$ 158.2    | 2384.6 $\pm$ 256.1 abc |
| CuCl <sub>2</sub> | 1954.9 $\pm$ 98.8 cd  | 3169.3 $\pm$ 160.2    | 3122.0 $\pm$ 295.3 c   |

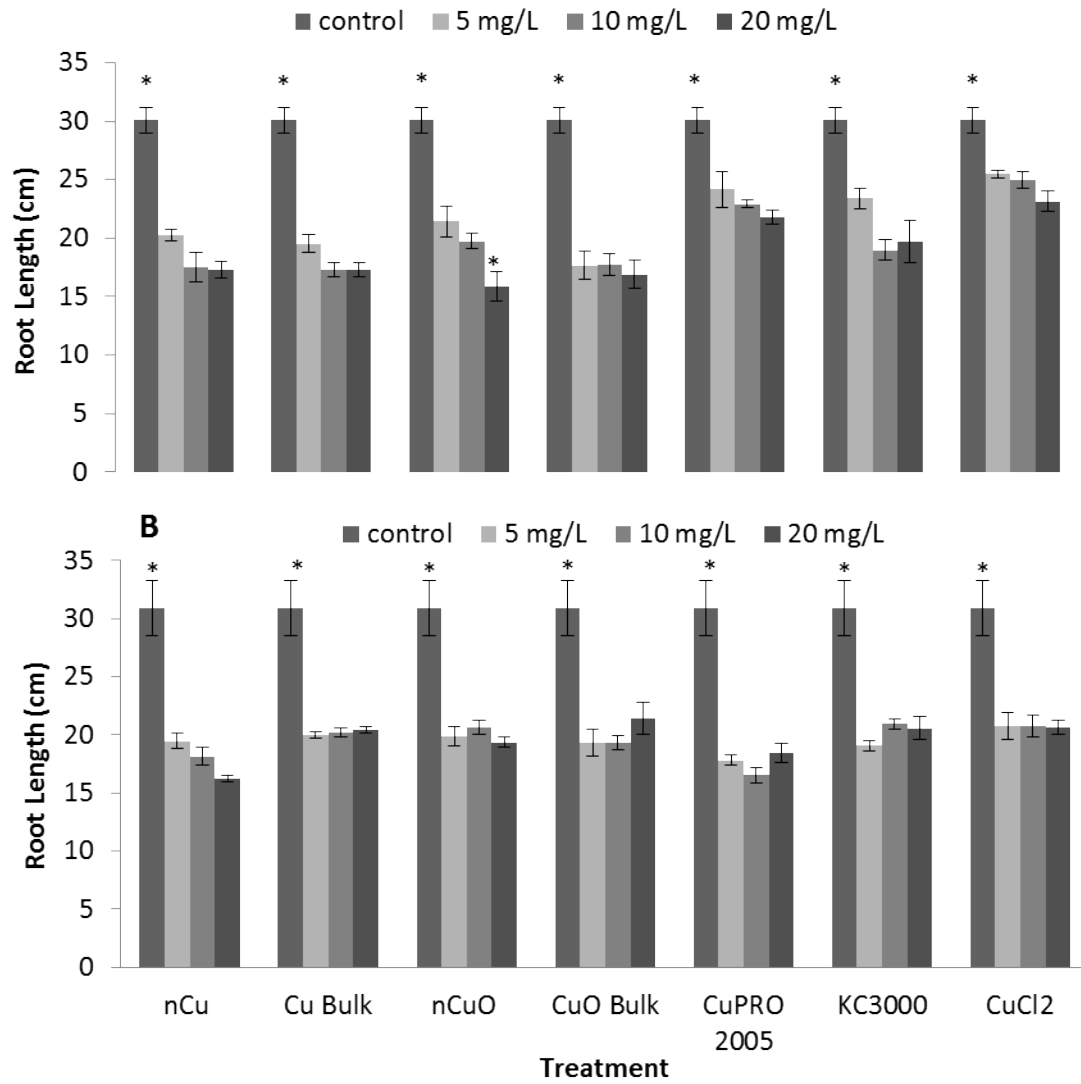

Figure S1.



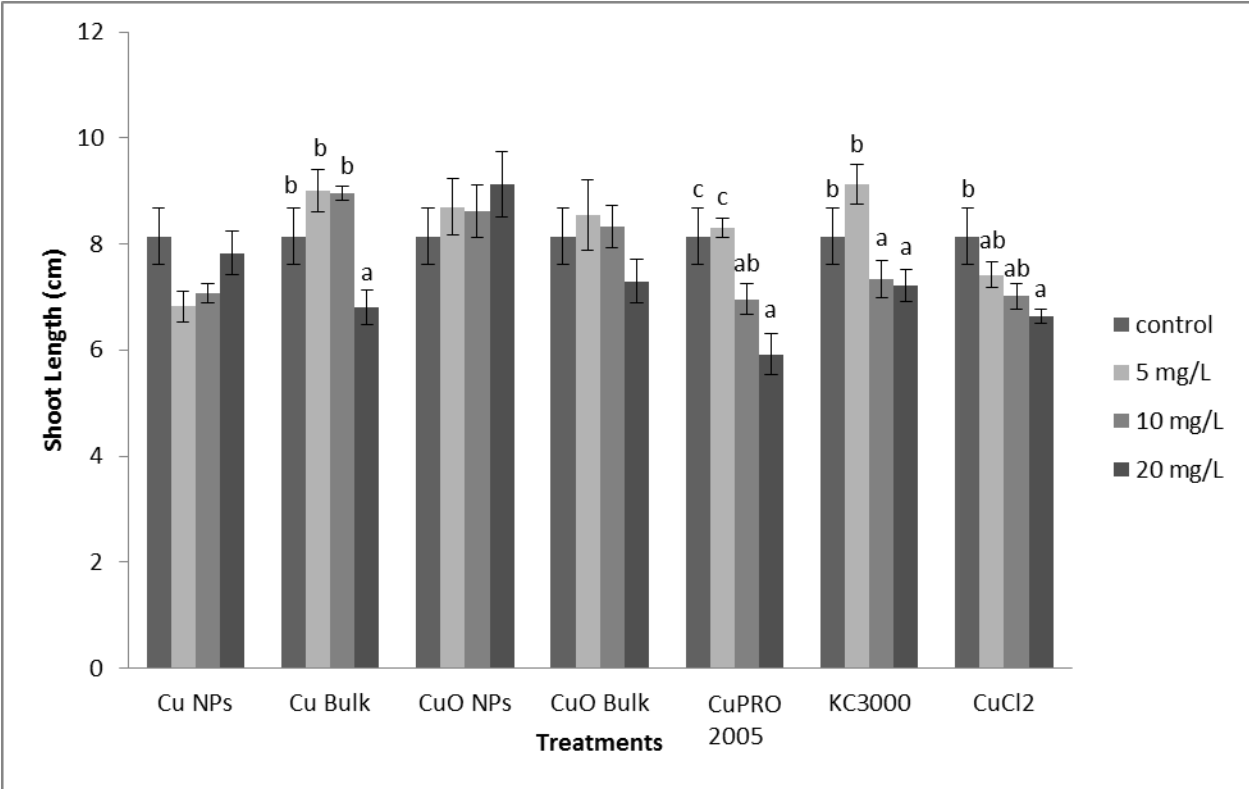

FigureS2.
